# Supplementary material
Source: PubMed Central journal article supplement (PMC4141045)
Supplement: NIHMS578196-supplement-01.pdf [file NIHMS578196-supplement-01.pdf]

## SUPPLEMENTAL INFORMATION

### SNX27 regulation of GIRK channels in VTA dopamine neurons attenuates *in vivo* cocaine response

Michaelanne B. Munoz<sup>1,2</sup> and Paul A. Slesinger<sup>1,2,3,§</sup>

<sup>1</sup>Peptide Biology Laboratories, The Salk Institute for Biological Studies, La Jolla, CA 92037

<sup>2</sup>Graduate Program in Biology, University of California, San Diego, La Jolla, CA 92093

<sup>3</sup>Dept. of Neuroscience, Icahn School of Medicine at Mount Sinai, New York, NY

#### Inventory of Supplemental Information:

1. Supplemental Table S1 (Related to Figure 1)

#### Supplemental Figure Legends

**Supplemental Table S1 (Related to Figure 1).** Intrinsic membrane properties, including membrane cell capacitance ( $C_m$ ), input membrane resistance ( $R_m$ ), resting membrane potential ( $V_{rest}$ ) and hyperpolarization current ( $I_h$ ) at -100 mV, were measured in VTA DA neurons from control Dat-Cre<sup>+/-</sup> and SNX27DA KO mice. Fast IPSCs frequency and amplitude were measured in VTA DA neurons.
