# Supplementary material
Source: PubMed Central journal article supplement (PMC4141045)
Supplement: NIHMS578196-supplement-02.pdf [file NIHMS578196-supplement-02.pdf]

## Supplemental Table S1

| VTA DA neurons               | Dat-Cre <sup>+/-</sup> |        |    | SNX27 <sub>DA</sub> KO |        |    |
|------------------------------|------------------------|--------|----|------------------------|--------|----|
|                              | mean                   | sem    | N  | mean                   | sem    | N  |
| <b>Intrinsic:</b>            |                        |        |    |                        |        |    |
| <b>C<sub>m</sub> (pF)</b>    | 48.4                   | ± 1.8  | 18 | 51.3                   | ± 3.0  | 25 |
| <b>R<sub>m</sub> (mOhm)</b>  | 94.6                   | ± 7.8  | 18 | 114.2                  | ± 9.3  | 24 |
| <b>V<sub>rest</sub> (mV)</b> | -63.23                 | ± 1.5  | 18 | -63.4                  | ± 1.3  | 24 |
| <b>I<sub>h</sub> (pA)</b>    | 512.73                 | ± 31.3 | 16 | 448.90                 | ± 46.8 | 25 |
|                              |                        |        |    |                        |        |    |
| <b>fIPSC inputs:</b>         |                        |        |    |                        |        |    |
| <b>Frequency (Hz)</b>        | 16.6                   | ± 1.9  | 5  | 14.0                   | ± 2.9  | 6  |
| <b>Amplitude (pA)</b>        | -29.0                  | ± 13.5 | 5  | -17.7                  | ± 4.8  | 6  |
